# Supplementary material
Source: MDPI journal article supplement (https://www.mdpi.com/1999-4907/13/2/158)
Supplement: s1 [file s1]

## Supplementary Information for

### **The Effect of the Conversion from Natural Broadleaved Forests into Chinese Fir (*Cunninghamia Lanceolata*) Plantations on Soil Microbial Communities and Nitrogen Functional Genes**

Jiahuan Guo <sup>1,2</sup>, Huili Feng <sup>1,2</sup>, Pierce McNie <sup>2</sup>, Weifeng Wang <sup>1</sup>, Changhui Peng <sup>2,3</sup>, Lei Feng <sup>4,5</sup>, Jiejie Sun <sup>1,5</sup>, Chang Pan <sup>1</sup> and Yuanchun Yu <sup>1,\*</sup>

<sup>1</sup> *Co-Innovation Center for Sustainable Forestry in Southern China, College of Biology and the Environment, Nanjing Forestry University, Nanjing 210037, China*

<sup>2</sup> *Institute of Environmental Sciences, Department of Biological Sciences, University of Quebec at Montreal, Montreal, QC H3C 3P8, Canada*

<sup>3</sup> *School of Geographic Sciences, Hunan Normal University, Changsha 410081, China*

<sup>4</sup> *College of Forestry, Nanjing Forestry University, Nanjing 210037, China*

<sup>5</sup> *Department of Forest and Conservation Sciences, Faculty of Forestry, University of British Columbia, Vancouver, BC V6T 1Z4, Canada*

\* Corresponding author: ycyu@njfu.edu.cn; Tel.: +86-(25)-8542-8810

## **2. Materials and Methods**

### *2.1 Site description and soil collection*

The natural broadleaved forest was dominated by tree species *Schima superba*, *Lithocarpus glaber*, *Hevea brasiliensis*, *Tsuga chinensis*, *Zelkova serrata*, and *Castanea henryi*; shrub species *Adinandra millettii*, *Rhododendron simsii*, *Vaccinium vitis-idaea*, *Symplocos sumuntia*, *Diplospora dubia*, *Piper austrosinense*, *Eurya japonica*, *Ficus hirta*, and *Itea chinensis*; and herbaceous species *Adiantum capillus-veneris*, *Alpinia pumila*, *Odontosoria chinensis*, *Alsophila spinulosa*, *Cibotium barometz*, *Dryopteris crassirhizoma*, *Ophiopogon bodinieri*, *Adiantum flabellulatum*, *Indocalamus tessellatus*, *Ophiopogon japonicus*, and *Cymbidium goeringii*.

The mixed-species plantation and Chinese fir plantation were developed from natural broadleaved forests 30 years ago. The mixed-species plantation was dominated by the tree species *Cunninghamia lanceolata* and *Schima superba*; shrub species *Litsea cubeba*, *Adinandra millettii*, *Maesa japonica*, *Dalbergia dyeriana*, *Eurya japonica*, *Ficus hispida*, *Ficus hirta*, *Piper austrosinense*, *Smilax glabra*, and *Rhododendron simsii*; and herbaceous species *Adiantum capillus-veneris*, *Odontosoria chinensis*, *Miscanthus floridulus*, *Alpinia pumila*, *Cymbidium goeringii*, *Lophatherum gracile*, *Alsophila spinulosa*, *Cibotium barometz*, *Dryopteris crassirhizoma*, *Ophiopogon bodinieri*, *Pteris semipinnata*, *Adiantum flabellulatum*, and *Begonia grandis*.

The Chinese fir plantation was dominated by tree species *Cunninghamia lanceolata*; shrub species *Litsea cubeba*, *Adinandra millettii*, *Dalbergia dyeriana*, *Rhododendron simsii*, and *Eurya japonica*; and herbaceous species *Adiantum capillus-veneris*, *Miscanthus floridulus*, *Lophatherum gracile*, *Ophiopogon bodinieri*, *Pteris semipinnata*, *Adiantum flabellulatum*, *Alsophila spinulosa*, and *Dicranopteris dichotoma*.

**Table S1.** Basic status of natural broadleaved forest (N), mixed-species forest (M), and Chinese fir (*Cunninghamia lanceolata*) plantation (P) (mean  $\pm$  Standard deviation).

| Stand | Age<br>(a) | Slope as-<br>pect | Slope<br>(°) | Mean tree<br>height (m) | Mean DBH<br>(cm) | Stand density<br>(plant ha <sup>-1</sup> ) | Land use<br>history |
|-------|------------|-------------------|--------------|-------------------------|------------------|--------------------------------------------|---------------------|
| N     | $\geq 30$  | Southwest         | 28           | 18.38 $\pm$ 1.66        | 18.60 $\pm$ 1.05 | 2210                                       | N                   |
| M     | 30         | Southwest         | 29           | 21.02 $\pm$ 1.28        | 16.23 $\pm$ 0.87 | 2505                                       | N                   |
| P     | 30         | Southwest         | 29           | 22.56 $\pm$ 0.93        | 14.98 $\pm$ 0.93 | 2500                                       | N                   |

DBH: diameter at breast height.

**Table S2.** Primers and PCR amplification conditions used in qPCR analysis of nitrogen cycle functional genes.

| Target genes             | Primers    | Sequences (5'–3')     | Fragment length (pb) | Amplification condition                                                             | References |
|--------------------------|------------|-----------------------|----------------------|-------------------------------------------------------------------------------------|------------|
| Bacterial<br><i>amoA</i> | amoAF      | STAATGGTCTGGCTTAGACG  | 270                  | 95°C–3min, 37 cycles,<br>95°C–30s, 53°C–30s,<br>72°C–45s, 72°C–<br>10min, 10°C hold | [1]        |
|                          | amoAR      | GCGGCCATCCATCTGTATGT  |                      |                                                                                     |            |
|                          |            |                       |                      |                                                                                     |            |
| Archaeal<br><i>amoA</i>  | amoA-1F    | GGGGTTTCTACTGGTGGT    | 371                  | 95°C–3min, 37 cycles,<br>95°C–30s, 55°C–30s,<br>72°C–45s, 72°C–<br>10min, 10°C hold | [2]        |
|                          | amoA-2R    | CCCCTCKGSAAAGCCTTCTTC |                      |                                                                                     |            |
|                          |            |                       |                      |                                                                                     |            |
| <i>nirS</i>              | cd3AF      | GTSAACGTSAAGGARACSGG  | 353                  | 95°C–3min, 37 cycles,<br>95°C–30s, 55°C–30s,<br>72°C–45s, 72°C–<br>10min, 10°C hold | [3]        |
|                          | R3cdR      | GASTTCGGRTGSGTCTTGA   |                      |                                                                                     |            |
|                          |            |                       |                      |                                                                                     |            |
| <i>nirK</i>              | F1aCu      | ATCATGGTSCTGCCGCG     | 385                  | 95°C–3min, 37 cycles,<br>95°C–20s, 63°C–30s,<br>72°C–30s, 72°C–<br>10min, 10°C hold | [4]        |
|                          | R3Cu       | GCCTCGATCAGRTTGTGGTT  |                      |                                                                                     |            |
|                          |            |                       |                      |                                                                                     |            |
| <i>norZ</i>              | nosZ-F     | CGYTGTTCMTCGACAGCCAG  | 360                  | 95°C–3min, 37 cycles,<br>95°C–5s, 58°C–30s,<br>72°C–30s, 72°C–<br>10min, 10°C hold  | [5]        |
|                          | nosZ-1622R | CGSACCTTSTTGCCSTYGCG  |                      |                                                                                     |            |
|                          |            |                       |                      |                                                                                     |            |

|             |       |                            |     |                       |     |
|-------------|-------|----------------------------|-----|-----------------------|-----|
| <i>nifH</i> |       | AAAGGYGGWATCGGYAARTCCAC-   |     | 95°C–3min, 37 cycles, |     |
|             | nifHF |                            |     | 95°C–30s, 55°C–30s,   |     |
|             |       | CAC                        | 390 | 72°C–45s, 72°C–       | [6] |
|             | nifHR | TTGTTSGCSGCRTACATSGCCATCAT |     | 10min, 10°C hold      |     |

(a)

## ----- Bacteria -----

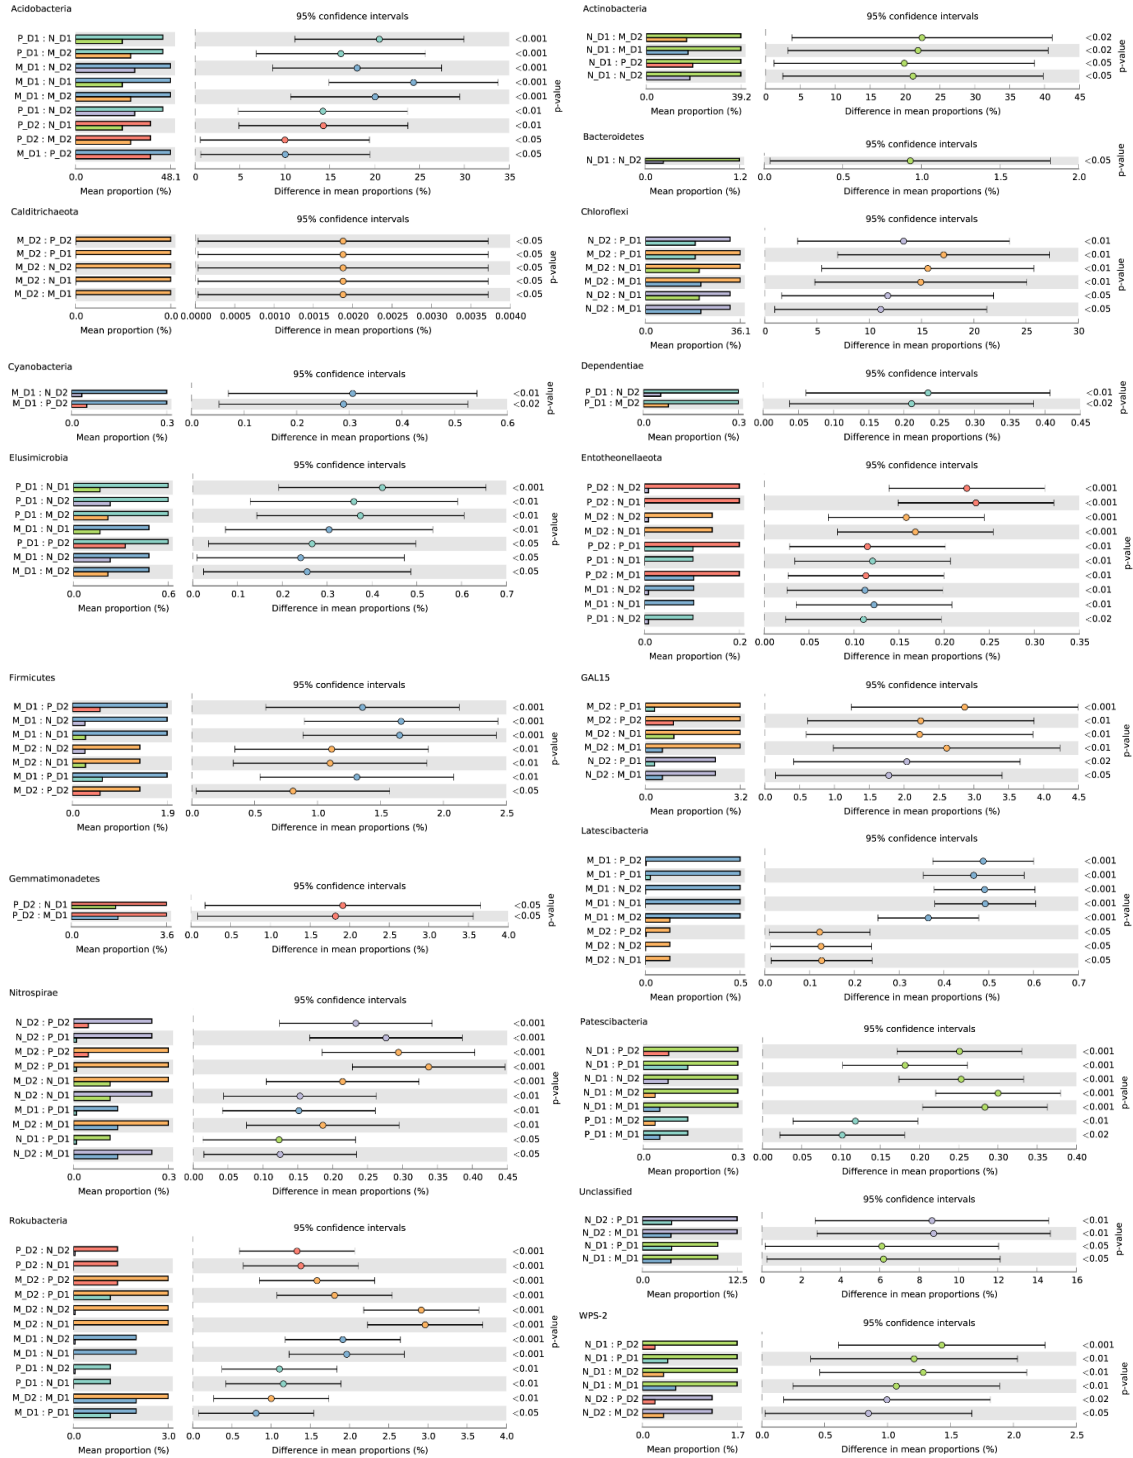

(b)

## ----- Archaea -----

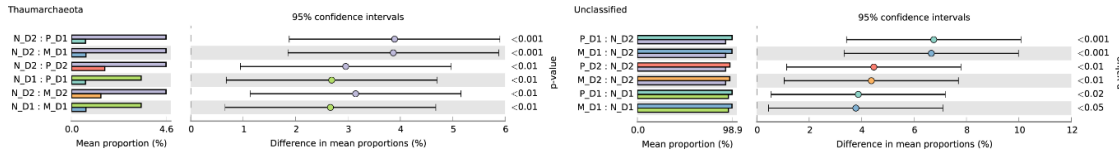

**Figure S1.** Comparison of the relative abundance of bacteria (a) and archaea (b) at the phyla level in different soil depths (D1: 0–20 cm, D2: 20–50 cm) from natural broadleaved forests (N), mixed-species plantations (M), and Chinese fir (*Cunninghamia lanceolata*) plantations (P). The plot presents only the phyla with a statistical difference by the Tukey-Kramer test ( $P < 0.05$ , after Bonferroni correction).

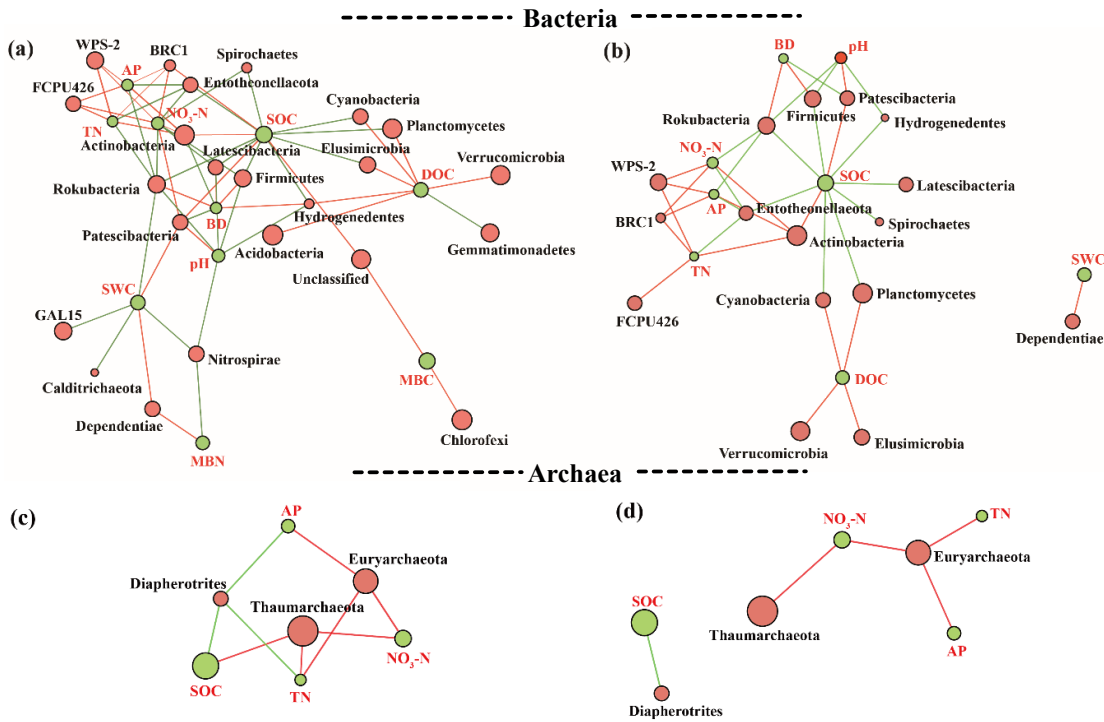

**Figure S2.** Pearson's rank correlation coefficients and statistical significance between phyla of bacteria and archaea to soil physiochemical properties. Left figures (a and c) show the difference at 0.05 level, and right figures (b and d) show the difference at 0.01 level. The size of red nodes in the graph represents abundance of species. The red line represents a positive correlation, and the green line represents a negative correlation. The thickness of the line indicates the size of the correlation coefficient. The thicker the line, the higher the correlation, vice versa. BD: bulk density; SWC: soil water content;  $\text{NO}_3^-$ -N: nitrate nitrogen;  $\text{NH}_4^+$ -N: ammonium nitrogen; TN: total nitrogen; SOC: soil organic carbon; DOC: dissolved organic carbon; MBC: microbial

biomass carbon; MBN: microbial biomass nitrogen; AP: available phosphorus.

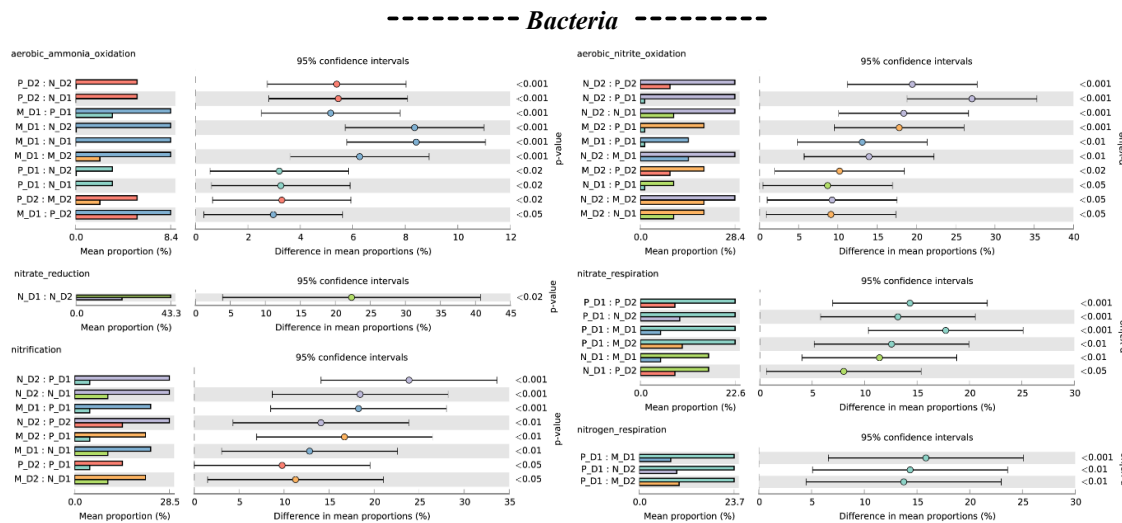

**Figure S3.** Comparison of the relative abundance of nitrogen functional bacterial communities in different soil depth (D1: 0–20 cm, D2: 20–50 cm) from natural broadleaved forests (N), mixed-species plantations (M), and Chinese fir (*Cunninghamia lanceolata*) plantations (P). The plot presents only the predicted functions with a statistical difference by the Tukey-Kramer test ( $P < 0.05$ , after Bonferroni correction).

## References

- Francis, C.A.; Roberts, K.J.; Beman, J.M.; Santoro, A.E.; Oakley, B.B. Ubiquity and diversity of ammonia-oxidizing archaea in water columns and sediments of the ocean. *Proc. Natl. Acad. Sci. U. S. A.* **2005**, *102*, 14683–14688.
- Rotthauwe, J.H.; Witzel, K.P.; Liesack, W. The ammonia monooxygenase structural gene *amoA* as a functional marker: molecular fine-scale analysis of natural ammonia-oxidizing populations. *Appl. Environ. Microbiol.* **1997**, *63*, 4704–4712.
- Palmer, K.; Biasi, C.; Horn, M.A. Contrasting denitrifier communities relate to contrasting  $N_2O$  emission patterns from acidic peat soils in arctic tundra. *ISME J.* **2012**, *6*, 1058–1077.
- Hallin, S.; Lindgren, P.-E. PCR detection of genes encoding nitrite reductase in denitrifying bacteria. *Appl. Environ. Microbiol.* **1999**, *65*, 1652–1657.
- Throbäck, I.N.; Enwall, K.; Jarvis, Å.; Hallin, S. Reassessing PCR primers targeting *nirS*, *nirK* and *nosZ* genes for community surveys of denitrifying bacteria with DGGE. *FEMS Microbiol. Ecol.* **2004**, *49*, 401–417.
- Rösch, C.; Mergel, A.; Bothe, H. Biodiversity of denitrifying and dinitrogen-fixing bacteria in an acid forest Soil. *Appl. Environ. Microbiol.* **2002**, *68*, 3818–3829.
